# Supplementary material
Source: PubMed Central journal article supplement (PMC8934176)
Supplement: NIHMS1766734-supplement-supplemental_figures.pdf [file NIHMS1766734-supplement-supplemental_figures.pdf]

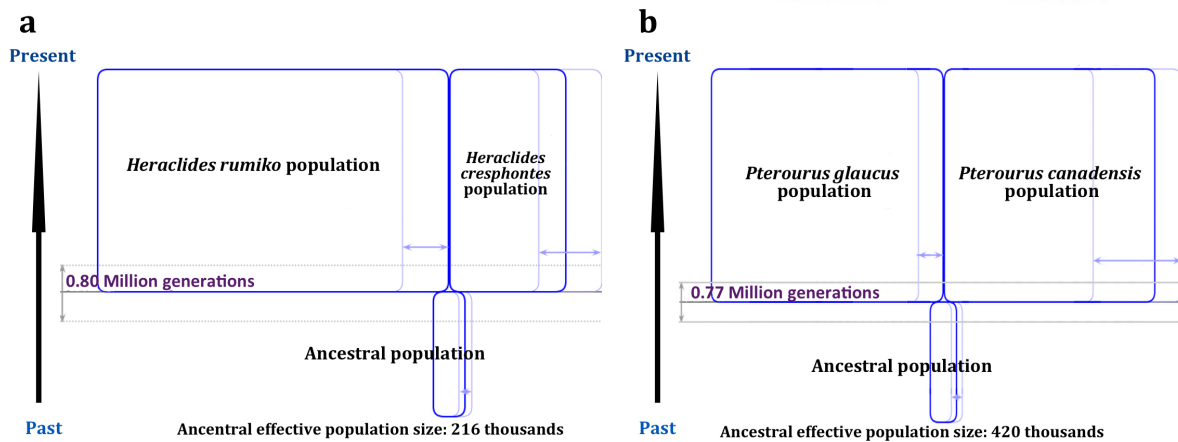

**Figure S1. Isolation with Migration model for the speciation events in (a) *Pterourus* and (b) *Heraclides* genera.**

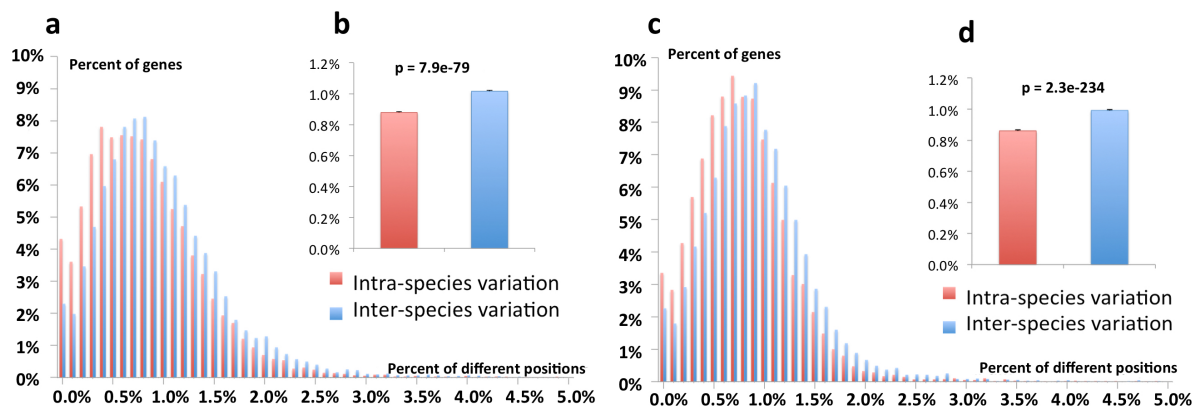

**Figure S2. Divergence in transcripts within and between species**

(a) Histogram of divergence in transcript sequences within (red bars) and between (blue bars) *Pterourus glaucus* and *P. canadensis*. (b) The average interspecific divergence over all transcripts is significantly higher than the average intraspecific divergence for the two *Pterourus* species. (c) Histogram of divergence in transcript sequences within (red bars) and between (blue bars) *Heraclides rumiko* and *H. cresphontes*. (d) The average interspecific divergence over all transcripts is significantly higher than the average intraspecific divergence for the two *Heraclides* species.
